# Supplementary material
Source: Copernicus journal article supplement (doi:10.5194/egusphere-2026-2769)
Supplement: Supplementary file 1 [file egusphere-2026-2769-supplement.pdf]

# Supplementary material for “NeuPlume: Probabilistic inversion of atmospheric point-source emissions from sparse observations”

Lei Wang<sup>1</sup> and Xin Ma<sup>2</sup>

<sup>1</sup>School of Earth and Space Science and Technology, Wuhan University, Wuhan 430079, China

<sup>2</sup>State Key Laboratory of Information Engineering in Surveying, Mapping and Remote Sensing, Wuhan University, Wuhan 430079, China

**Correspondence:** Xin Ma (maxinwhu@whu.edu.cn)

## Supplementary Figure S1. Posterior Distribution for Synthetic Case 1

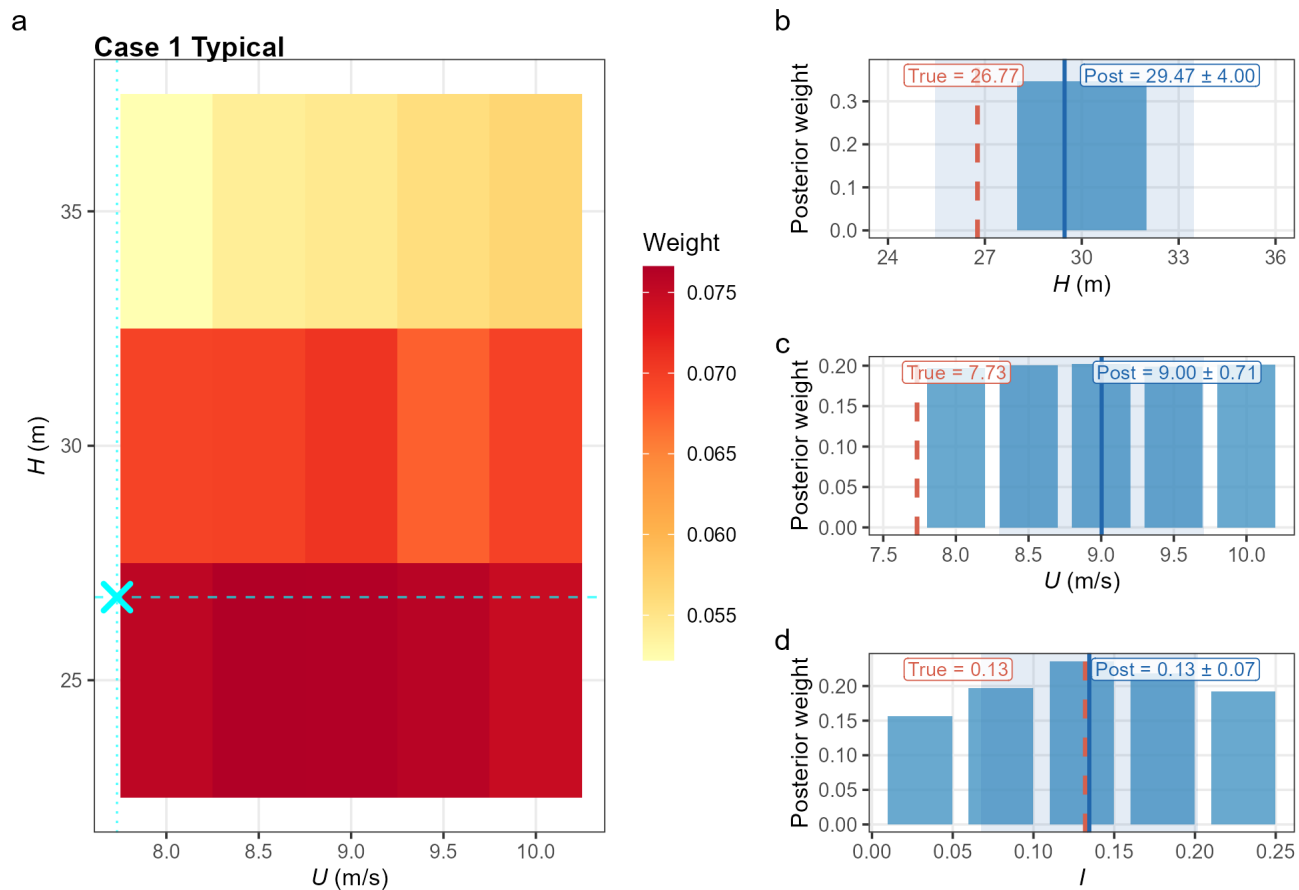

**Figure S1.** Complete posterior distribution for synthetic Case 1. It shows the joint density and marginal histograms of the three parameters ( $H$ ,  $U$ , and  $I$ ) at  $\tau = 1.0$ .  $H$  and  $U$  exhibit clear unimodal posteriors, indicating strong identifiability of effective release height and wind speed in this case. The marginal distribution of  $I$  is wider, indicating weaker observational constraints on turbulence intensity.

## Supplementary Figure S2. Orthogonal concentration slices

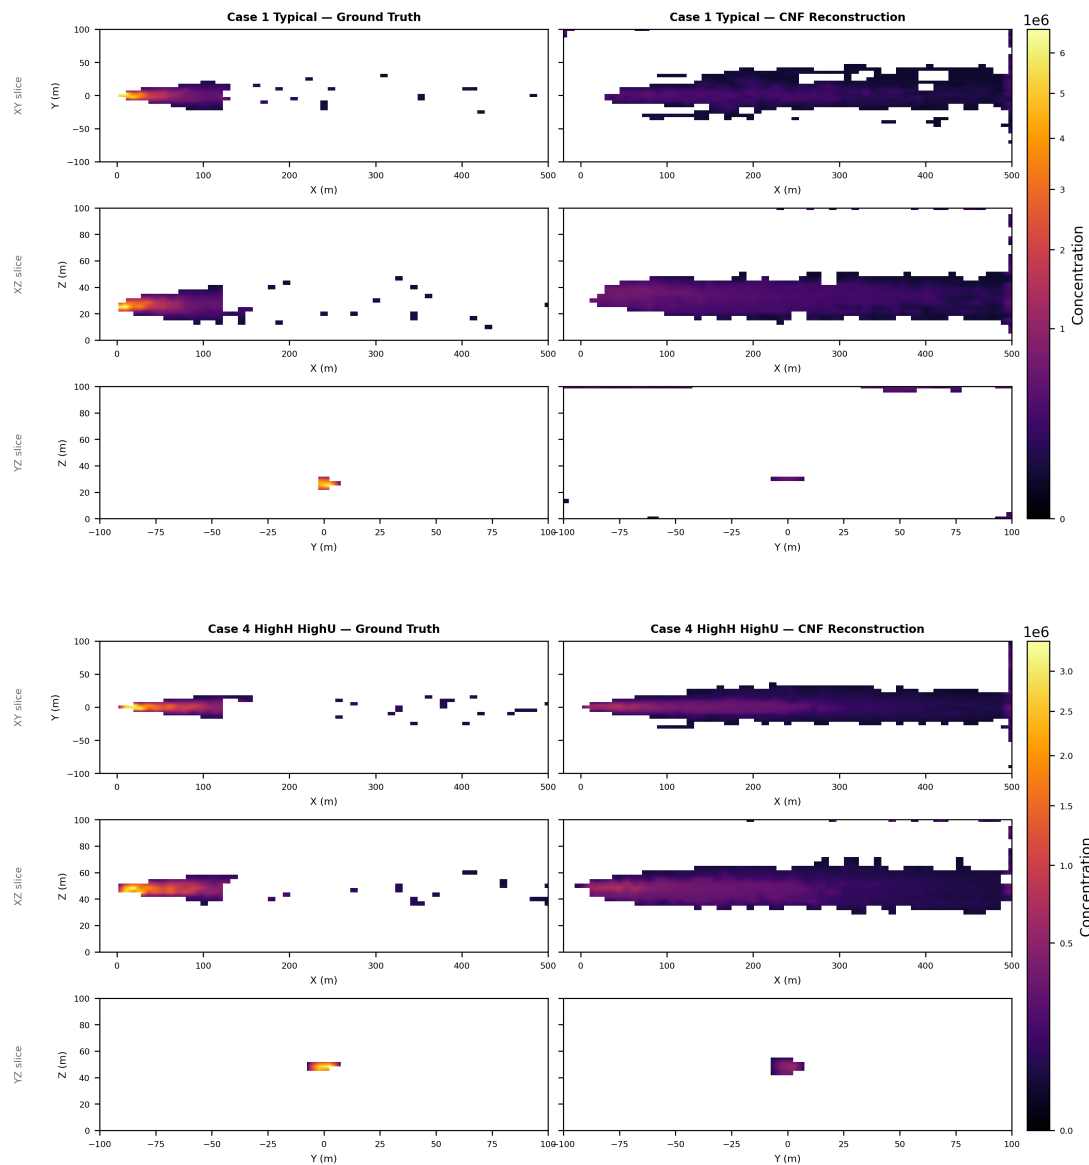

**Figure S2.** Orthogonal concentration slice comparison for Case 1 and Case 4. Top: ground-truth fields from the Lagrangian stochastic model; bottom: NeuPlume conditional neural field reconstructions. Rows show the  $xy$ ,  $xz$ , and  $yz$  cross-sections through the plume centerline, assessing whether Hash-INR compression preserves the main plume morphology and vertical structure.

### Supplementary Figure S3. 6-case parameter errors

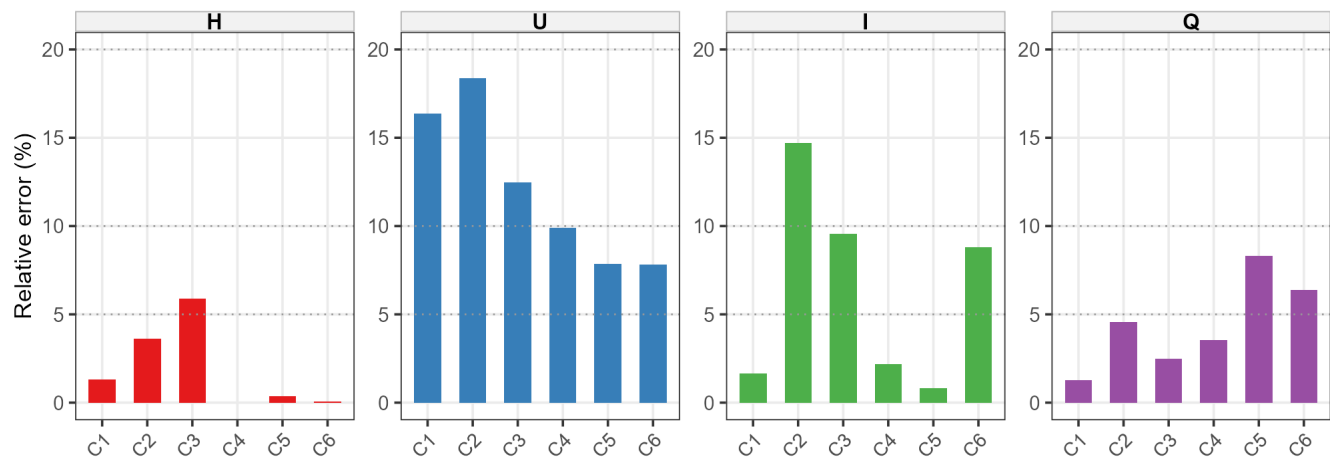

**Figure S3.** Per-case parameter errors for the 6 synthetic test cases under the blind-inversion protocol. The figure reports relative errors (%) for the 4 inversion parameters ( $Q$ ,  $H$ ,  $U$ , and  $I$ ), complementing the mean-error summary in the main-text synthetic-results table.

## 5 Supplementary Table S1. Coarse-to-fine search ablation

**Table S1.** Case-wise results for the coarse-to-fine search ablation. Values are  $Q$  and  $H$  inversion errors (%) for six synthetic cases.

| Case                    | $Q$ error: coarse only (%) | $Q$ error: coarse-to-fine search (%) | $H$ error: coarse only (%) | $H$ error: coarse-to-fine search (%) |
|-------------------------|----------------------------|--------------------------------------|----------------------------|--------------------------------------|
| 1 – Typical case        | 13.7                       | 14.2                                 | 12.1                       | 1.1                                  |
| 2 – High $I$            | 34.4                       | 10.9                                 | 12.6                       | 1.3                                  |
| 3 – Low $H$ , low $U$   | 49.9                       | 17.3                                 | 6.1                        | 4.8                                  |
| 4 – High $H$ , high $U$ | 1.7                        | 2.1                                  | 4.3                        | 0.3                                  |
| 5 – Low $U$             | 15.0                       | 7.3                                  | 11.6                       | 0.5                                  |
| 6 – Very high $I$       | 35.4                       | 8.2                                  | 5.1                        | 0.6                                  |
| <b>Mean</b>             | <b>25.0</b>                | <b>10.0</b>                          | <b>8.6</b>                 | <b>1.4</b>                           |

## Supplementary Table S2. Gaussian plume control experiment

Gaussian plume (GP) control on analytical GP synthetic data. GP/NeuPlume inversion errors (%) are reported; known- $U$  GP errors are  $< 0.01\%$ , so the main-text synthetic-results table mainly reflects non-Gaussian plume morphology, not GP implementation error.

**Table S2.** Gaussian plume control experiment.

| Case                    | GP known- $U$ $Q$ error (%)  | GP known- $U$ $H$ error (%)  | GP blind inversion $Q$ error (%) | GP blind inversion $U$ error (%) |
|-------------------------|------------------------------|------------------------------|----------------------------------|----------------------------------|
| 1 – Typical             | $<0.01$                      | $<0.01$                      | 180                              | —                                |
| 2 – High $I$            | $<0.01$                      | $<0.01$                      | 195                              | —                                |
| 3 – Low $H$ , low $U$   | $<0.01$                      | $<0.01$                      | 643                              | —                                |
| 4 – High $H$ , high $U$ | $<0.01$                      | $<0.01$                      | 99                               | —                                |
| 5 – Low $U$             | $<0.01$                      | $<0.01$                      | 1991                             | —                                |
| 6 – Very high $I$       | $<0.01$                      | $<0.01$                      | 1196                             | —                                |
| <b>Mean</b>             | <b><math>&lt;0.01</math></b> | <b><math>&lt;0.01</math></b> | <b>718</b>                       | —                                |

10 **Supplementary Table S3. Real-data baselines**

**Table S3.** Pniówek V ventilation-shaft baselines. GP and MB use the same four NeuPlume flights reported in the main-text real-data table; IG =  $9.5 \pm 3.5$  kt/yr is the same-campaign published reference.

| Flight | GP blind<br>$\hat{Q}$ (kt/yr) | GP blind<br>$\hat{H}$ (m) | GP known $U$<br>$\hat{Q}$ (kt/yr) | GP known $U$<br>$\hat{H}$ (m) | MB known $U$<br>$\hat{Q}$ (kt/yr) |
|--------|-------------------------------|---------------------------|-----------------------------------|-------------------------------|-----------------------------------|
| #11    | 831                           | —                         | 46                                | —                             | 0.009                             |
| #12    | 31                            | —                         | 41                                | —                             | 0.013                             |
| #14    | 1792                          | —                         | 49                                | —                             | 0.055                             |
| #15    | 25                            | —                         | 32                                | —                             | 0.040                             |

## Supplementary Table S4. Boundary-loss and posterior-scope diagnostics

**Table S4.** Boundary-loss diagnostics for the six synthetic cases. The diagnostic uses the same LSM domain, time step, emission rate, and one wash-out cycle as the manuscript simulations.

| Metric                              | Mean  | Minimum              | Maximum |
|-------------------------------------|-------|----------------------|---------|
| Particle exit fraction              | 0.925 | 0.911                | 0.931   |
| Retained particle fraction          | 0.075 | 0.069                | 0.089   |
| Side/top share of exits             | 0.082 | $7.7 \times 10^{-6}$ | 0.207   |
| Downwind share of exits             | 0.918 | 0.793                | 1.000   |
| Side/top share of emitted particles | 0.077 | $7.0 \times 10^{-6}$ | 0.192   |

**Table S5.** Posterior height-boundary and wind-scaling diagnostics for the real UAV flights. Height flags indicate posterior or MAP estimates within 5 m of the 50 m grid upper bound, including MAP values above the bound after continuous refinement.

| Flight | Height-boundary flag | $\bar{U}_{blind}/U_{meteo}$ | $\bar{Q}_{blind}/\bar{Q}_{known-U}$ |
|--------|----------------------|-----------------------------|-------------------------------------|
| #11    | yes                  | 0.37                        | 0.43                                |
| #12    | yes                  | 0.36                        | 0.51                                |
| #14    | no                   | 0.30                        | 0.68                                |
| #15    | no                   | 2.17                        | 3.41                                |
